# Supplementary material for: Hydrogen peroxide-induced oxidative stress activates NF-κB and Nrf2/Keap1 signals and triggers autophagy in piglets
Source: Royal Society of Chemistry journal article supplement (doi:10.1039/c4ra13557a), 2015-01-01
Supplement: c4ra13557a1.pdf [file c4ra13557a1.pdf]

## Supplementary Material

Hydrogen peroxide-induced oxidative stress activates NF- $\kappa$ B and Nrf2/keap1 signals  
and triggers autophagy in piglets

**Table S1.**

Oxidative stress parameters in serum after exposure to H<sub>2</sub>O<sub>2</sub>. The measured variables include superoxide dismutase (SOD), glutathione peroxidase (GSH-Px), catalase, total antioxidant capability (T-AOC), malondialdehyde (MDA), OH•, H<sub>2</sub>O<sub>2</sub>. These parameters in serum were measured at 2, 50, 98, and 170 h after administration of H<sub>2</sub>O<sub>2</sub>. The details of methodology are described under Materials and methods. Data are presented as mean  $\pm$  SE. The values having different superscript letters were significantly different ( $P < 0.05$ ;  $n = 6$ ).

| Item                                       | control group       | gas-5% H <sub>2</sub> O <sub>2</sub> | gas-10% H <sub>2</sub> O <sub>2</sub> | per-10% H <sub>2</sub> O <sub>2</sub> |
|--------------------------------------------|---------------------|--------------------------------------|---------------------------------------|---------------------------------------|
| <b>2 h (0 d)</b>                           |                     |                                      |                                       |                                       |
| SOD (U/mgprot)                             | 126.42 $\pm$ 4.43   | 126.18 $\pm$ 3.20                    | 131.60 $\pm$ 5.55                     |                                       |
| MDA (nmol/mgprot)                          | 3.22 $\pm$ 0.25     | 2.75 $\pm$ 0.36                      | 2.76 $\pm$ 0.52                       |                                       |
| GSH-Px (U/mgprot)                          | 58.10 $\pm$ 4.37    | 52.14 $\pm$ 6.64                     | 59.05 $\pm$ 7.80                      |                                       |
| catalase (U/mgprot)                        | 4.99 $\pm$ 0.55     | 5.35 $\pm$ 1.04                      | 4.95 $\pm$ 0.74                       |                                       |
| T-AOC (U/mgprot)                           | 3.05 $\pm$ 0.23     | 2.84 $\pm$ 0.44                      | 3.21 $\pm$ 0.25                       |                                       |
| OH• (U/mgprot)                             | 1464.46 $\pm$ 70.13 | 1491.62 $\pm$ 74.19                  | 1228.53 $\pm$ 51.39                   |                                       |
| H <sub>2</sub> O <sub>2</sub> (mmol/gprot) | 18.70 $\pm$ 4.92    | 16.17 $\pm$ 2.38                     | 18.21 $\pm$ 4.38                      |                                       |
| <b>50 h (2 d)</b>                          |                     |                                      |                                       |                                       |
| SOD (U/mgprot)                             | 122.94 $\pm$ 4.40   | 127.88 $\pm$ 4.86                    | 128.23 $\pm$ 10.18                    |                                       |
| MDA (nmol/mgprot)                          | 2.88 $\pm$ 0.36     | 2.54 $\pm$ 0.40                      | 2.56 $\pm$ 0.19                       |                                       |
| GSH-Px (U/mgprot)                          | 75.62 $\pm$ 5.04b   | 87.43 $\pm$ 6.18ab                   | 95.71 $\pm$ 5.49a                     |                                       |
| catalase (U/mgprot)                        | 5.89 $\pm$ 0.95a    | 2.79 $\pm$ 0.54b                     | 1.72 $\pm$ 0.27b                      |                                       |
| T-AOC (U/mgprot)                           | 3.73 $\pm$ 0.59     | 2.98 $\pm$ 0.49                      | 2.50 $\pm$ 0.28                       |                                       |
| OH• (U/mgprot)                             | 1337.18 $\pm$ 55.59 | 1242.11 $\pm$ 54.46                  | 1174.01 $\pm$ 72.73                   |                                       |
| H <sub>2</sub> O <sub>2</sub> (mmol/gprot) | 23.70 $\pm$ 3.13    | 20.13 $\pm$ 2.15                     | 20.09 $\pm$ 0.52                      |                                       |
| <b>98 h (4 d)</b>                          |                     |                                      |                                       |                                       |
| SOD (U/mgprot)                             | 112.69 $\pm$ 2.28   | 110.21 $\pm$ 9.65                    | 121.98 $\pm$ 4.96                     |                                       |
| MDA (nmol/mgprot)                          | 2.62 $\pm$ 0.20     | 2.36 $\pm$ 0.39                      | 3.05 $\pm$ 0.32                       |                                       |
| GSH-Px (U/mgprot)                          | 98.10 $\pm$ 1.90a   | 98.10 $\pm$ 3.01a                    | 85.52 $\pm$ 3.49b                     |                                       |
| catalase (U/mgprot)                        | 4.02 $\pm$ 1.92     | 6.74 $\pm$ 1.97                      | 5.96 $\pm$ 1.39                       |                                       |
| T-AOC (U/mgprot)                           | 3.33 $\pm$ 1.03     | 2.74 $\pm$ 0.22                      | 2.66 $\pm$ 0.48                       |                                       |
| OH• (U/mgprot)                             | 1218.83 $\pm$ 68.68 | 2219.10 $\pm$ 596.00                 | 1880.14 $\pm$ 378.64                  |                                       |
| H <sub>2</sub> O <sub>2</sub> (mmol/gprot) | 13.22 $\pm$ 6.08    | 14.59 $\pm$ 6.02                     | 34.63 $\pm$ 15.32                     |                                       |
| <b>170 h (7 d)</b>                         |                     |                                      |                                       |                                       |
| SOD (U/mgprot)                             | 116.17 $\pm$ 11.27  | 118.66 $\pm$ 7.70                    | 118.12 $\pm$ 5.50                     | 105.68 $\pm$ 2.76                     |
| MDA (nmol/mgprot)                          | 2.40 $\pm$ 0.38     | 2.66 $\pm$ 0.26                      | 2.76 $\pm$ 0.40                       | 1.97 $\pm$ 0.15                       |
| GSH-Px (U/mgprot)                          | 89.52 $\pm$ 5.08a   | 96.35 $\pm$ 5.15a                    | 64.00 $\pm$ 7.93b                     | 83.57 $\pm$ 1.31a                     |

|                                            |               |                |                |                |
|--------------------------------------------|---------------|----------------|----------------|----------------|
| catalase (U/mgprot)                        | 3.13±0.61ab   | 5.13±0.87a     | 3.90±0.98a     | 0.99±0.08b     |
| T-AOC (U/mgprot)                           | 2.20±0.30     | 1.89±0.18      | 1.65±0.37      | 1.65±0.15      |
| OH <sup>•</sup> (U/mgprot)                 | 865.17±82.86b | 1209.28±92.10a | 1235.71±99.23a | 941.19±94.491b |
| H <sub>2</sub> O <sub>2</sub> (mmol/gprot) | 5.73±0.87     | 20.30±1.38     | 15.76±2.84     | 15.88±1.58     |

**Table S2.**

Oxidative stress parameters in the greater curvature (A) and jejunum (B) after exposure to H<sub>2</sub>O<sub>2</sub>. The measured variables include superoxide dismutase (SOD), glutathione peroxidase (GSH-Px), catalase, total antioxidant capability (T-AOC), malondialdehyde (MDA), OH<sup>•</sup>, H<sub>2</sub>O<sub>2</sub>. These parameters were measured at 7 d (170 h) after administration of H<sub>2</sub>O<sub>2</sub>. The details of methodology are described under Materials and methods. Data are presented as mean ± SE. The values having different superscript letters were significantly different (P < 0.05; n = 6).

**A**

| Item                                       | control group | gas-5% H <sub>2</sub> O <sub>2</sub> | gas-10% H <sub>2</sub> O <sub>2</sub> |
|--------------------------------------------|---------------|--------------------------------------|---------------------------------------|
| SOD (U/mgprot)                             | 90.04±2.25b   | 103.27±2.05a                         | 80.83±3.34b                           |
| MDA (nmol/mgprot)                          | 0.37±0.02b    | 0.46±0.01a                           | 0.47±0.02a                            |
| GSH-Px (U/mgprot)                          | 26.87±3.77    | 28.74±3.50                           | 25.31±4.31                            |
| catalase (U/mgprot)                        | 1.01±0.07     | 1.12±0.05                            | 0.95±0.07                             |
| T-AOC (U/mgprot)                           | 0.96±0.14a    | 0.34±0.14b                           | 0.55±0.08b                            |
| OH <sup>•</sup> (U/mgprot)                 | 177.38±13.27b | 244.87±12.01ab                       | 301.78±33.80a                         |
| H <sub>2</sub> O <sub>2</sub> (mmol/gprot) | 2.36±0.16     | 1.60±0.25                            | 2.07±0.51                             |

**B**

| Item                                       | control group | gas-5% H <sub>2</sub> O <sub>2</sub> | gas-10%H <sub>2</sub> O <sub>2</sub> | per-10%H <sub>2</sub> O <sub>2</sub> |
|--------------------------------------------|---------------|--------------------------------------|--------------------------------------|--------------------------------------|
| SOD (U/mgprot)                             | 51.31±3.18    | 49.46±1.52                           | 53.17±2.18                           | 50.10±0.51                           |
| MDA (nmol/mgprot)                          | 0.33±0.02b    | 0.37±0.03ab                          | 0.48±0.06a                           | 0.30±0.06b                           |
| GSH-Px (U/mgprot)                          | 14.35±1.68    | 14.04±1.04                           | 10.53±0.76                           | 12.09±2.09                           |
| catalase (U/mgprot)                        | 0.71±0.08     | 0.67±0.05                            | 0.68±0.08                            | 0.65±0.06                            |
| T-AOC (U/mgprot)                           | 0.65±0.11a    | 0.33±0.01b                           | 0.34±0.05b                           | 0.41±0.03b                           |
| OH <sup>•</sup> (U/mgprot)                 | 203.71±7.95   | 216.30±5.49                          | 207.22±8.12                          | 225.90±7.06                          |
| H <sub>2</sub> O <sub>2</sub> (mmol/gprot) | 3.77±0.43     | 2.99±0.12                            | 3.39±0.67                            | 2.62±0.64                            |

**Table S3.**

The intestinal villus height and crypt depth after exposure to H<sub>2</sub>O<sub>2</sub>. The duodenal, jejunal, and ileal villus height and crypt depth were measured at 7 d (170 h) after administration of H<sub>2</sub>O<sub>2</sub>. The details of methodology are described under Materials and methods. Data are presented as mean ± SE. The values having different superscript letters were significantly different ( $P < 0.05$ ;  $n = 6$ ).

| Item                        | control group | gas-5% H <sub>2</sub> O <sub>2</sub> | gas-10% H <sub>2</sub> O <sub>2</sub> | per-10% H <sub>2</sub> O <sub>2</sub> |
|-----------------------------|---------------|--------------------------------------|---------------------------------------|---------------------------------------|
| duodenal villus height (um) | 429.00±22.01  | 405.50±18.53                         | 399.22±34.58                          | 387.92±23.34                          |
| duodenal crypt depth (um)   | 152.02±11.88  | 123.00±11.18                         | 141.53±16.30                          | 134.45±10.95                          |
| duodenal V/C                | 2.90±0.28     | 2.87±0.23                            | 2.89±0.21                             | 2.80±0.32                             |
| jejunal villus height (um)  | 332.57±13.00b | 365.90±120.02a                       | 372.86±23.65a                         | 342.14±20.45ab                        |
| jejunal crypt depth (um)    | 182.50±17.37  | 163.27±15.57                         | 168.08±22.56                          | 164.42±10.69                          |
| jejunal V/C                 | 1.97±0.02     | 2.31±0.14                            | 1.94±0.22                             | 2.03±0.19                             |
| ileal villus height (um)    | 257.28±9.17b  | 307.94±10.09a                        | 302.48±14.40a                         | 281.40±14.48ab                        |
| ileal crypt depth (um)      | 104.54±11.23  | 125.07±9.07                          | 96.70±11.29                           | 129.86±18.96                          |
| ileal V/C                   | 2.43±0.22     | 2.56±0.23                            | 2.91±0.34                             | 2.34±0.34                             |

**Table S4.**

Gene expression of occludin and ZO-1 in the pylorus, great curvature, duodenum, jejunum, and ileum after exposure to H<sub>2</sub>O<sub>2</sub> at 7 d (170 h). The details of RT-PCR are described under Materials and methods. Data are presented as mean ± SE. The values having different superscript letters were significantly different ( $P < 0.05$ ;  $n = 6$ ).

| Item            | control group | gas-5%<br>H <sub>2</sub> O <sub>2</sub> | gas-10% H <sub>2</sub> O <sub>2</sub> | per-10%<br>H <sub>2</sub> O <sub>2</sub> |
|-----------------|---------------|-----------------------------------------|---------------------------------------|------------------------------------------|
| great curvature |               |                                         |                                       |                                          |
| Occludin        | 1.00±0.20a    | 0.51±0.06b                              | 0.45±0.07b                            |                                          |
| ZO-1            | 1.00±0.13     | 0.73±0.12                               | 0.82±0.22                             |                                          |
| pylorus         |               |                                         |                                       |                                          |
| Occludin        | 1.00±0.20     | 1.31±0.14                               | 1.09±0.16                             |                                          |
| ZO-1            | 1.00±0.12b    | 1.18±0.08ab                             | 1.44±0.18a                            |                                          |
| duodenum        |               |                                         |                                       |                                          |
| Occludin        | 1.00±0.15b    | 1.58±0.18a                              | 1.03±0.11b                            | 1.20±0.17b                               |
| ZO-1            | 1.00±0.09b    | 1.33±0.10a                              | 0.57±0.10c                            | 1.05±0.13ab                              |
| ileum           |               |                                         |                                       |                                          |
| Occludin        | 1.00±0.19a    | 0.30±0.07b                              | 0.22±0.02b                            | 0.40±0.10b                               |
| ZO-1            | 1.00±0.16a    | 0.54±0.05b                              | 0.63±0.06b                            | 0.80±0.10ab                              |

**Table S5.**

Gene expression of LC3 and beclin1 in the pylorus, great curvature, duodenum, jejunum, and ileum after exposure to H<sub>2</sub>O<sub>2</sub> at 7 d (170 h). The details of RT-PCR are described under Materials and methods. Data are presented as mean  $\pm$  SE. The values having different superscript letters were significantly different ( $P < 0.05$ ; n = 6)

| Item            | control group    | gas-5% H <sub>2</sub> O <sub>2</sub> | gas-10% H <sub>2</sub> O <sub>2</sub> | per-10% H <sub>2</sub> O <sub>2</sub> |
|-----------------|------------------|--------------------------------------|---------------------------------------|---------------------------------------|
| great curvature |                  |                                      |                                       |                                       |
| LC3             | 1.00 $\pm$ 0.13  | 0.93 $\pm$ 0.09                      | 1.26 $\pm$ 0.31                       |                                       |
| Beclin1         | 1.00 $\pm$ 0.16  | 0.65 $\pm$ 0.09                      | 1.34 $\pm$ 0.29                       |                                       |
| pylorus         |                  |                                      |                                       |                                       |
| LC3             | 1.00 $\pm$ 0.10  | 1.36 $\pm$ 0.12                      | 1.15 $\pm$ 0.17                       |                                       |
| Beclin1         | 1.00 $\pm$ 0.12  | 0.83 $\pm$ 0.11                      | 0.73 $\pm$ 0.06                       |                                       |
| duodenum        |                  |                                      |                                       |                                       |
| LC3             | 1.00 $\pm$ 0.14b | 2.05 $\pm$ 0.48a                     | 0.68 $\pm$ 0.07b                      | 1.26 $\pm$ 0.39b                      |
| Beclin1         | 1.00 $\pm$ 0.15  | 1.67 $\pm$ 0.38                      | 1.21 $\pm$ 0.16                       | 1.29 $\pm$ 0.21                       |
| jejunum         |                  |                                      |                                       |                                       |
| LC3             | 1.00 $\pm$ 0.43b | 2.47 $\pm$ 0.72a                     | 1.10 $\pm$ 0.40b                      | 2.70 $\pm$ 0.73a                      |
| Beclin1         | 1.00 $\pm$ 0.09  | 1.36 $\pm$ 0.24                      | 0.98 $\pm$ 0.10                       | 1.86 $\pm$ 0.23                       |
| ileum           |                  |                                      |                                       |                                       |
| LC3             | 1.00 $\pm$ 0.12a | 0.58 $\pm$ 0.04b                     | 0.92 $\pm$ 0.13a                      | 1.07 $\pm$ 0.17a                      |
| Beclin1         | 1.00 $\pm$ 0.20a | 0.39 $\pm$ 0.05b                     | 0.66 $\pm$ 0.13b                      | 0.67 $\pm$ 0.11b                      |

**Table S6.**

Proinflammatory cytokines (IL-6, IL-8, IL-17 and TNF- $\alpha$ ) gene expression in the pylorus, great curvature, duodenum, jejunum, and ileum were detected with RT-PCR after exposure to H<sub>2</sub>O<sub>2</sub> at 7 d (170 h). The details of RT-PCR are described under Materials and methods. Data are presented as mean  $\pm$  SE. The values having different superscript letters were significantly different ( $P < 0.05$ ; n = 6).

| Item            | control group    | gas-5%<br>H2O2    | gas-10%<br>H2O2   | per-10%H2O2       |
|-----------------|------------------|-------------------|-------------------|-------------------|
| great curvature |                  |                   |                   |                   |
| IL-6            | 1.00 $\pm$ 0.20a | 0.44 $\pm$ 0.05b  | 0.71 $\pm$ 0.09ab |                   |
| IL-8            | 1.00 $\pm$ 0.06b | 3.48 $\pm$ 0.36a  | 3.55 $\pm$ 0.58a  |                   |
| IL-17           | 1.00 $\pm$ 0.43  | 0.49 $\pm$ 0.20   | 0.26 $\pm$ 0.13   |                   |
| TNF- $\alpha$   | 1.00 $\pm$ 0.20  | 1.01 $\pm$ 0.06   | 1.14 $\pm$ 0.09   |                   |
| pylorus         |                  |                   |                   |                   |
| IL-6            | 1.00 $\pm$ 0.04b | 1.85 $\pm$ 0.12a  | 1.65 $\pm$ 0.12ab |                   |
| IL-8            | 1.00 $\pm$ 0.15  | 1.11 $\pm$ 0.17   | 1.47 $\pm$ 0.45   |                   |
| IL-17           | 1.00 $\pm$ 0.12  | 0.82 $\pm$ 0.09   | 0.86 $\pm$ 0.18   |                   |
| TNF- $\alpha$   | 1.00 $\pm$ 0.20  | 0.85 $\pm$ 0.08   | 1.06 $\pm$ 0.18   |                   |
| duodenum        |                  |                   |                   |                   |
| IL-6            | 1.00 $\pm$ 0.07  | 0.78 $\pm$ 0.14   | 0.99 $\pm$ 0.13   | 0.76 $\pm$ 0.08   |
| IL-8            | 1.00 $\pm$ 0.09a | 1.02 $\pm$ 0.15a  | 0.88 $\pm$ 0.14ab | 0.62 $\pm$ 0.11b  |
| IL-17           | 1.00 $\pm$ 0.11b | 1.99 $\pm$ 0.33a  | 1.52 $\pm$ 0.22ab | 1.51 $\pm$ 0.42ab |
| TNF- $\alpha$   | 1.00 $\pm$ 0.13a | 1.02 $\pm$ 0.11a  | 0.99 $\pm$ 0.08a  | 0.69 $\pm$ 0.07b  |
| ileum           |                  |                   |                   |                   |
| IL-6            | 1.00 $\pm$ 0.11  | 0.93 $\pm$ 0.12   | 0.71 $\pm$ 0.16   | 1.11 $\pm$ 0.21   |
| IL-8            | 1.00 $\pm$ 0.23a | 0.21 $\pm$ 0.09b  | 0.40 $\pm$ 0.03b  | 0.43 $\pm$ 0.09b  |
| IL-17           | 1.00 $\pm$ 0.14  | 0.85 $\pm$ 0.17   | 1.27 $\pm$ 0.23   | 0.88 $\pm$ 0.11   |
| TNF- $\alpha$   | 1.00 $\pm$ 0.16b | 1.62 $\pm$ 0.21ab | 2.58 $\pm$ 0.30ab | 2.26 $\pm$ 0.26a  |

**Table S7**

PCR primer sequences: the forward primers (F) and the reverse primers (R) used in this study are tabulated along with their accession No. and product length.

| Gene           | Accession No.  | Nucleotide sequence of primers (5'-3')                    | Size (bp) |
|----------------|----------------|-----------------------------------------------------------|-----------|
| $\beta$ -Actin | DQ845171.1     | F: CTGCGGCATCCACGAAACT<br>R: AGGGCCGTGATCTCCTTCTG         | 147       |
| MnSOD          | NM_214127      | F: GGACAAATCTGAGCCCTAACG<br>R: CCTTGTTGAAACCGAGCC         | 159       |
| CuZnSOD        | NM_001190422   | F: CAGGTCTCACTTCAATCC<br>R: CCAAACGACTTCCASCAT            | 255       |
| GPx1           | NM_214201      | F: TGGGGAGATCCTGAATTG<br>R: GATAAACTTGGGGTCGGT            | 183       |
| GPx4           | NM_214407.1    | F: GATTCTGGCCTTCCCTTGC<br>R: TCCCCTTGGGCTGGACTTT          | 172       |
| catalase       | NM_214301.2    | F: CGAAGGCGAAGGTGTTTG<br>R: AGTGTGCGATCCATATCC            | 374       |
| ZO-1           | XM_003353439.2 | F: CCTGCTTCTCCAAAACTCTT<br>R: TTCTATGGAGCTCAACACCC        | 252       |
| occludin       | NM_001163647.2 | F: ACGAGCTGGAGGAAGACTGGATC<br>R: CCCTTAACTTGCTTCAGTCTATTG | 238       |
| LC3            | XM_002728433.2 | F: CCGAACCTTCGAACAGAGAG<br>R: AGGCTTGGTTAGCATTGAGC        | 206       |
| beclin1        | NM_001034117.1 | F: AGGAGCTGCCGTTGTACTGT<br>R: CACTGCCTCCTGTGTCTTCA        | 189       |
| IL-6           | NM_001252429.1 | CAAAGCCACCACCCCTAAC<br>TCGTTCTGTGACTGCAGCTT               | 66        |
| IL-8           | XM_003361958.1 | TTCTTCTTTATCCCCAAACTGG<br>CCACATGTCCTCAAGGTAGGA           | 63        |
| IL-17          | NM_001005729.1 | CTCTCGTGAAGGCGGGAATC<br>GTAATCTGAGGGCCGTCTGG              | 137       |
| TNF $\alpha$   | NM_214022.1    | TTCCTCACTCACACCATCAGCC<br>TGCCCAGATTCAGCAAAGTCC           | 224       |

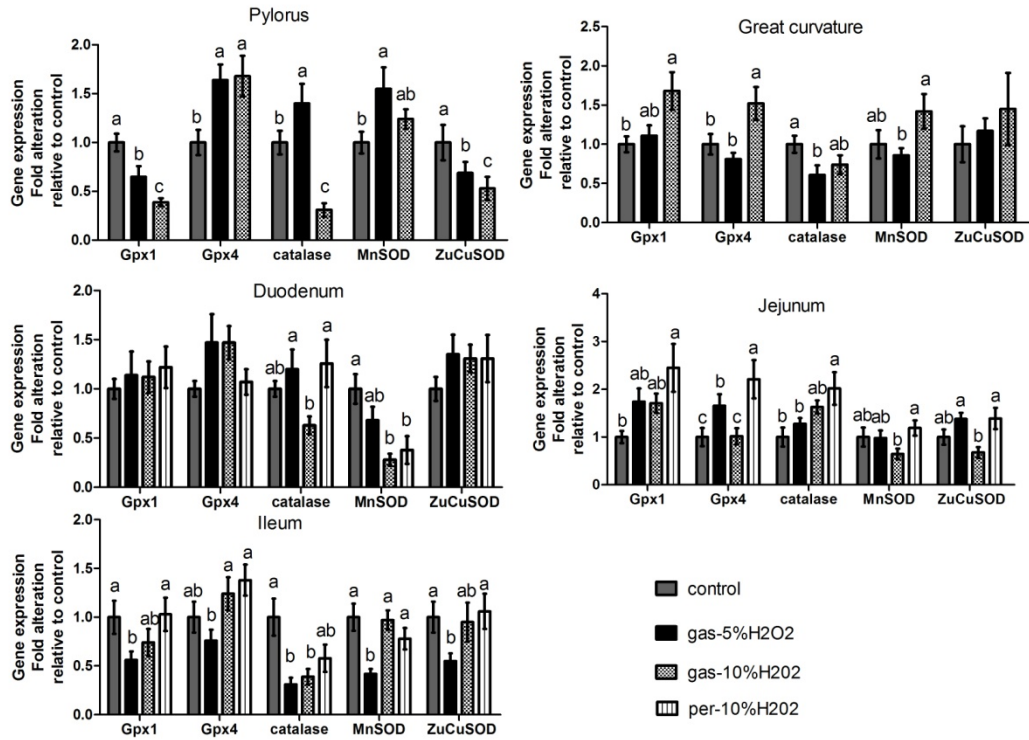

Figure S1. Gene expression of antioxidant enzymes (Gpx1, Gpx4, catalase, MnSOD, and ZnCuSOD) in the pylorus, great curvature, duodenum, jejunum, and ileum after exposure to H<sub>2</sub>O<sub>2</sub> at 7 d. The details of RT-PCR are described under Materials and methods. Data are presented as mean  $\pm$  SE. The values having different superscript letters were significantly different ( $P < 0.05$ ;  $n = 6$ ).
